# Supplementary material for: The Depletion of Carbohydrate Metabolic Genes in the Gut Microbiome Contributes to the Transition From Central Obesity to Type 2 Diabetes
Source: Front Endocrinol (Lausanne). 2021 Oct 22;12:747646. doi: 10.3389/fendo.2021.747646 (PMC8569854; doi:10.3389/fendo.2021.747646)
Supplement: Supplementary file 15 [file Table_7.xlsx]

## Sheet: Sheet1
Unique gene ID	MeanDecreaseAccuracy	MeanDecreaseGini	Genus annotation	Species annotation
gene_893444	12.61	1.42	Bacteroides	Bacteroides fragilis
gene_4634846	12.32	1.44	Clostridium	Clostridium sp. CAG:470
gene_750260	11.98	1.58	Bacteroides	Bacteroides sp. CAG:709
gene_3878193	11.43	1.38	Bacteroides	Bacteroides sp. 3_1_40A
gene_76240	11.42	1.74	Prevotella	Prevotella bryantii
gene_750264	11.36	1.26	Prevotella	Prevotella sp. CAG:1092
gene_2075472	10.82	1.38	Wocania	Wocania ichthyoenteri
gene_506104	10.81	0.98	NA	NA
gene_1712322	10.12	1.03	NA	NA
gene_2550032	9.94	0.95	NA	NA
gene_917927	9.88	0.86	Clostridium	Clostridium butyricum
gene_3417934	9.7	0.65	Parabacteroides	unclassified Parabacteroides species
gene_750267	9.38	1.09	Bacteroides	Bacteroides faecichinchillae
gene_1967331	9.28	0.82	Prevotella	Prevotella sp. CAG:1092
gene_750266	9.18	1.24	Prevotella	Prevotella sp. MA2016
gene_4181907	9.17	1.24	unclassified Bacteroidales genus	unclassified Bacteroidales species
gene_750265	9.05	0.96	Bacteroides	Bacteroides fragilis
gene_1111419	9.01	0.66	Phocaeicola	Phocaeicola massiliensis
gene_183834	8.94	0.67	Bacteroides	Bacteroides eggerthii
gene_579124	8.74	0.75	unclassified Bacteroidales genus	unclassified Bacteroidales species
gene_4161749	8.5	0.83	Bacteroides	unclassified Bacteroides species
gene_1712323	8.2	0.62	unclassified Bacteroidales genus	unclassified Bacteroidales species
gene_241503	8.15	0.68	Prevotella	Prevotella sp. CAG:386
gene_2846302	7.82	0.83	NA	NA
gene_3022026	7.78	0.8	Phocaeicola	Phocaeicola massiliensis
gene_2846300	7.73	0.85	Bacteroides	Bacteroides fragilis
gene_1129217	7.43	0.59	Phocaeicola	Phocaeicola vulgatus
gene_2809902	7.39	0.3	Prevotella	Prevotella sp. CAG:520
gene_4289150	7.25	0.51	unclassified Eubacteriales genus	butyrate-producing bacterium SS3/4
gene_750268	7.24	0.69	NA	NA
gene_3185701	7.1	0.51	Prevotella	Prevotella copri
gene_1149676	6.7	0.73	Prevotella	Prevotella brevis
gene_19188	6.69	0.39	Chlamydia	Chlamydia trachomatis
gene_1129206	6.69	0.57	Bacteroides	Bacteroides sp. CAG:530
gene_1149678	6.59	0.59	NA	NA
gene_2875848	6.51	0.41	Bacillus	Bacillus sp. FJAT-27916
gene_625270	6.48	0.36	Dorea	Dorea longicatena
gene_2846301	6.32	0.55	Pedobacter	Pedobacter kyungheensis
gene_2846307	6.24	0.56	Bacteroides	Bacteroides ovatus
gene_1111417	6.19	0.36	Prevotella	Prevotella sp. CAG:1092
gene_2875842	6.08	0.39	Bacteroides	Bacteroides sp. CAG:633
gene_1124634	6.04	0.46	Prevotella	Prevotella sp. CAG:891
gene_188003	5.91	0.31	Parabacteroides	Parabacteroides gordonii
gene_3394190	5.8	0.41	unclassified Bacteroidales genus	unclassified Bacteroidales species
gene_2846305	5.56	0.45	Bacteroides	Bacteroides fragilis
gene_2846308	5.44	0.45	Porphyromonas	Porphyromonas catoniae
gene_2796874	5.35	0.22	unclassified Erysipelotrichaceae genus	unclassified Erysipelotrichaceae species
gene_2379139	5.19	0.49	Phocaeicola	Phocaeicola dorei
gene_2846304	5.15	0.4	Bacteroides	Bacteroides fragilis
gene_2388286	5.11	0.31	Veillonella	Veillonella sp. CAG:933
gene_2809729	5.1	0.2	Fusobacterium	Fusobacterium perfoetens
gene_750263	4.85	0.3	Prevotella	Prevotella sp. CAG:891
gene_3262953	4.85	0.27	Bacteroides	unclassified Bacteroides species
gene_2739196	4.82	0.42	Prevotella	Prevotella sp. CAG:1124
gene_1494185	4.81	0.18	Prevotella	Prevotella sp. CAG:520
gene_2846293	4.75	0.31	unclassified Bacteria genus	uncultured bacterium
gene_2319152	4.67	0.3	Candidatus Symbiothrix	Candidatus Symbiothrix dinenymphae
gene_1069865	4.64	0.27	Fusobacterium	Fusobacterium mortiferum
gene_2846306	4.58	0.3	Bacteroides	Bacteroides fragilis
gene_1967328	4.56	0.27	unclassified Bacteroidales genus	unclassified Bacteroidales species
gene_2846303	4.5	0.35	unclassified Bacteroidales genus	unclassified Bacteroidales species
gene_890701	4.49	0.15	Fusobacterium	Fusobacterium ulcerans
gene_1129990	4.4	0.22	Fusobacterium	Fusobacterium mortiferum
